# Supplementary material for: Polyethylenimine-Conjugated Hydroxyethyl Cellulose for Doxorubicin/Bcl-2 siRNA Co-Delivery Systems
Source: MDPI journal article supplement (doi:10.3390/pharmaceutics15020708), 2023-02-20
Supplement: s1 [file s1]

## Supplementary Materials

Figure S1. Synthesis scheme of HEC2k

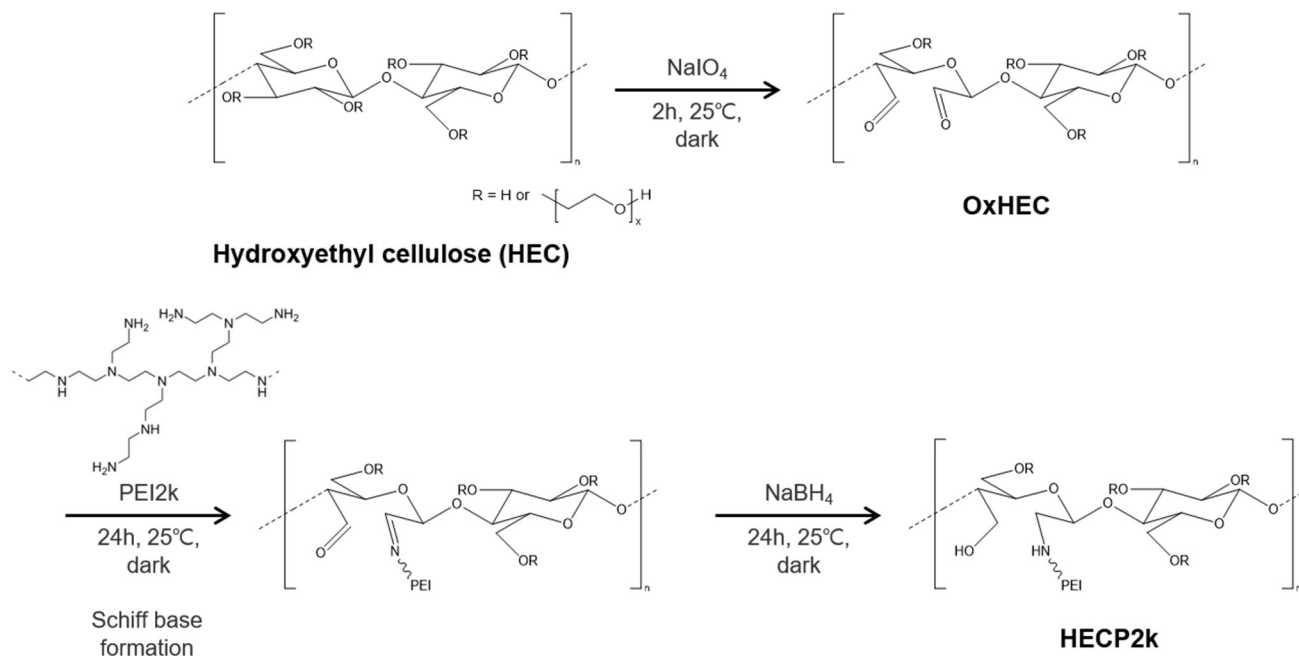

Figure S2. GPC chromatograms of polymers. Each sample was prepared at a concentration of 10 mg/mL. 1% formic acid was used as an eluent. The assay was run at 0.6 mL/min of flow rate.

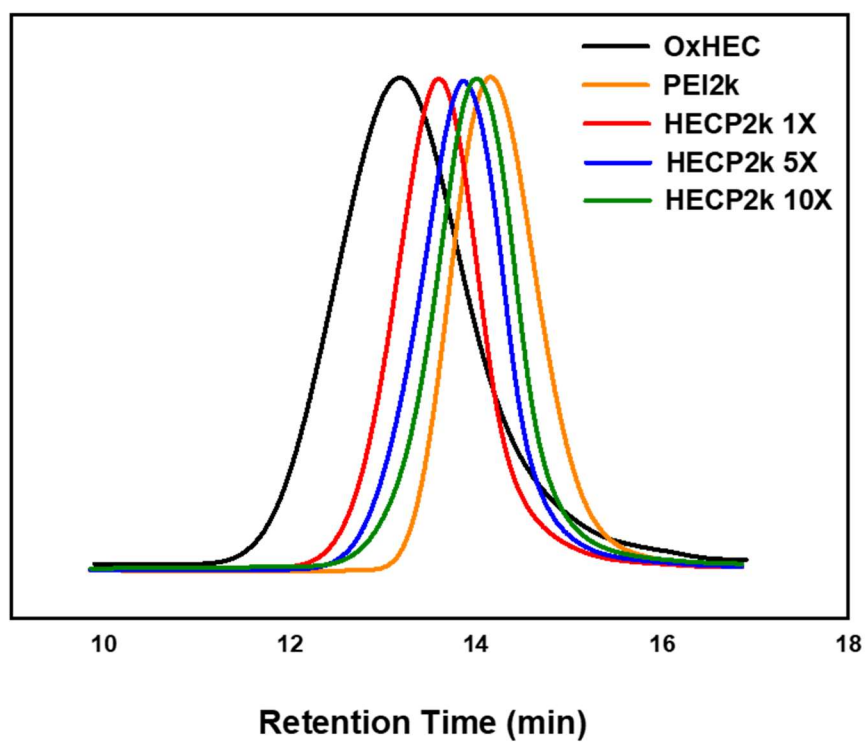

Figure S3.  $^{13}\text{C}$  NMR spectra of HECp2k 10X.

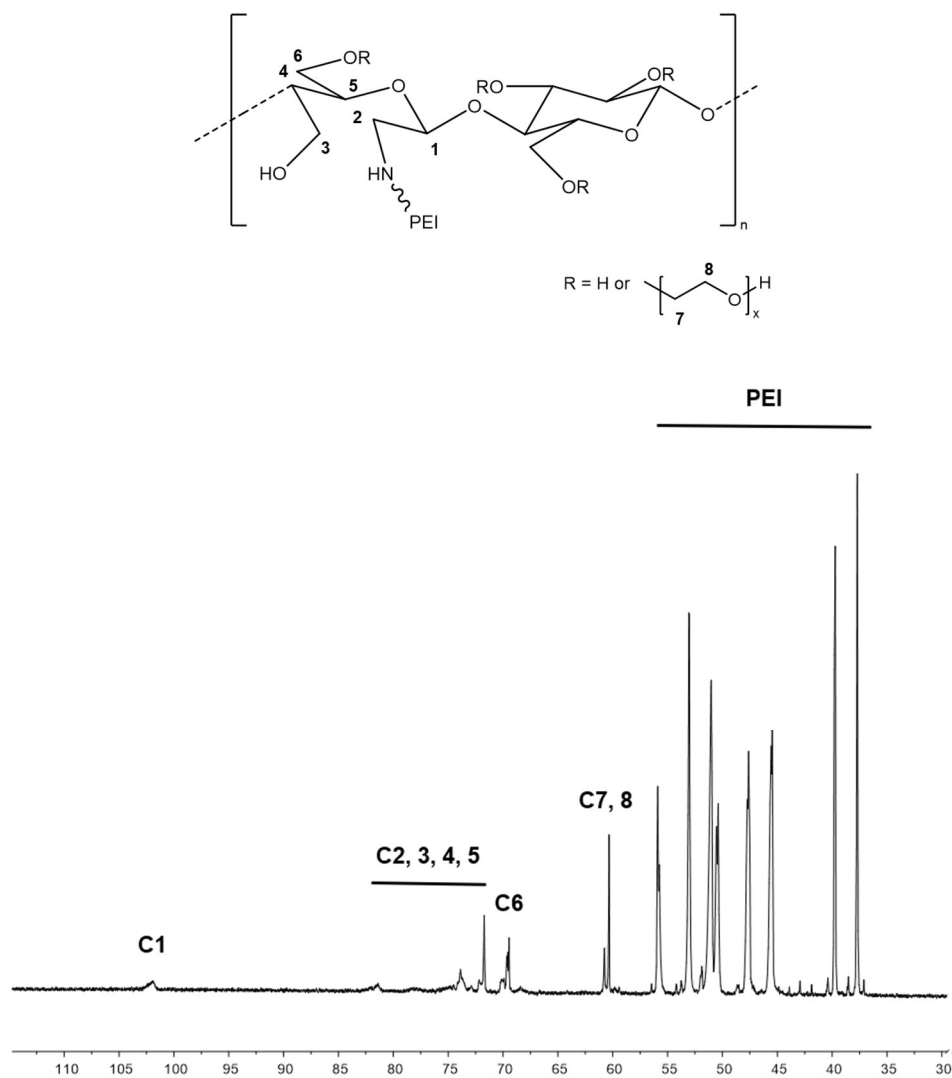

Figure S4. FT-IR spectra of polymers.

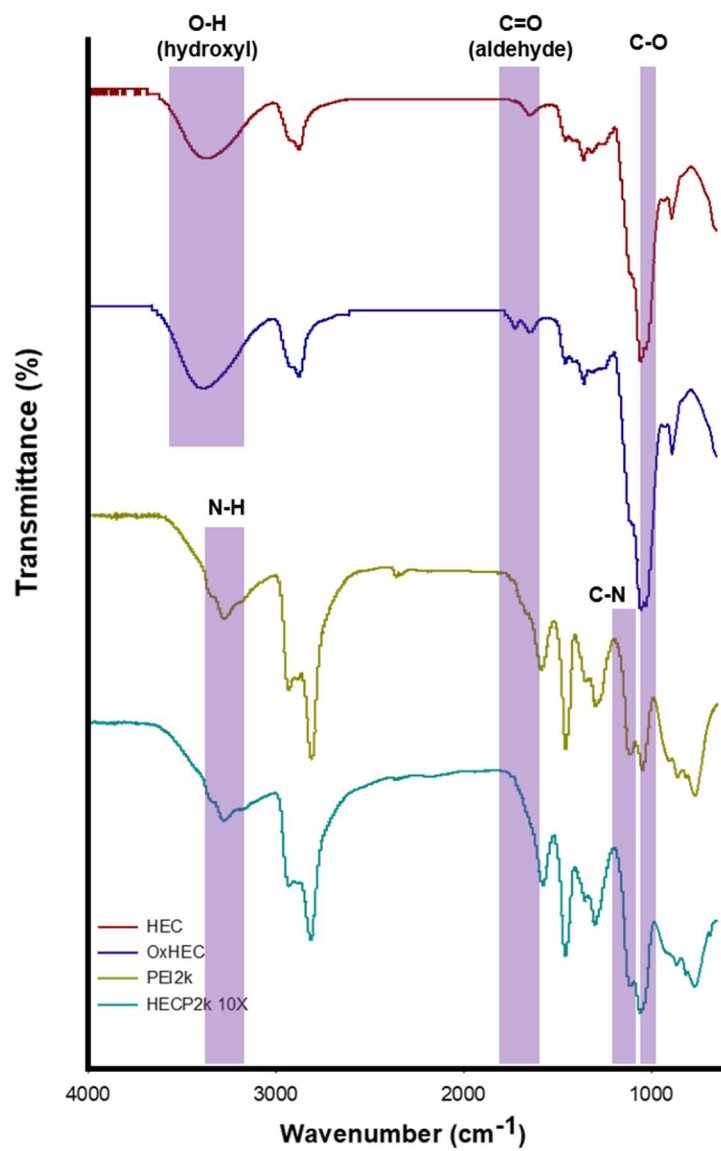

Figure S5. CLSM images of PEI25k/pDNA (A, C) and HECp2k 10X/pDNA (B, D) polyplexes in HeLa cells. pDNA was labeled by YOYO-1 (green). Nuclei and acidic organelles were stained by DAPI (blue) and Lysotracker red DND-99 (red), respectively. After 4 h of treatment, cells were visualized after further incubation of (A, B) 0 h and (C, D) 2 h.

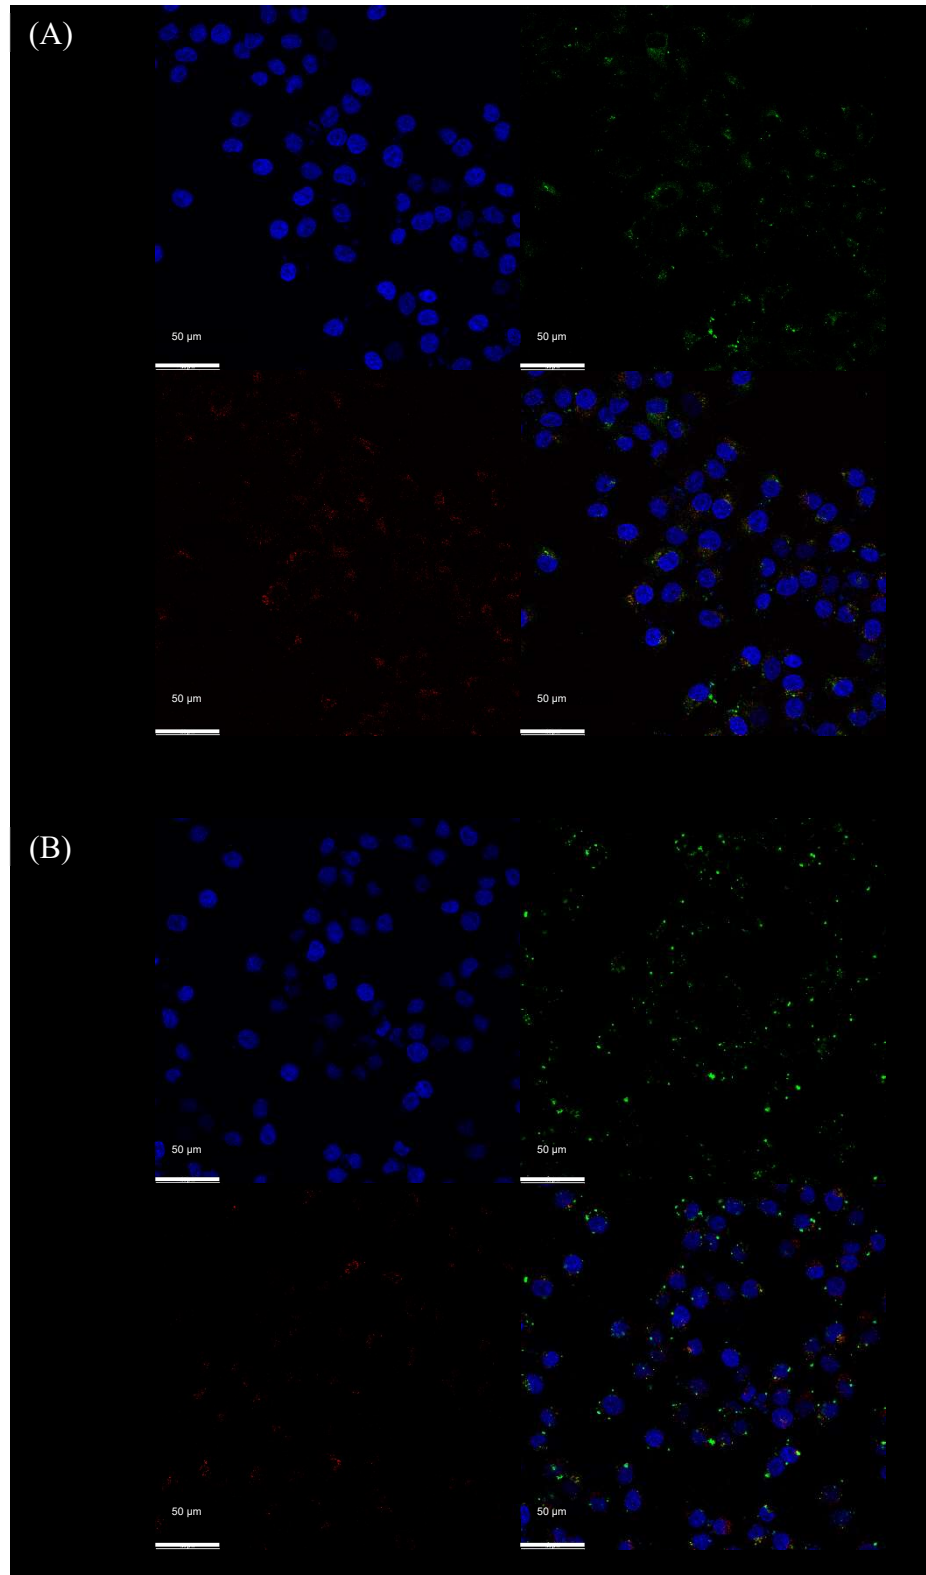

Figure S5. Continued.

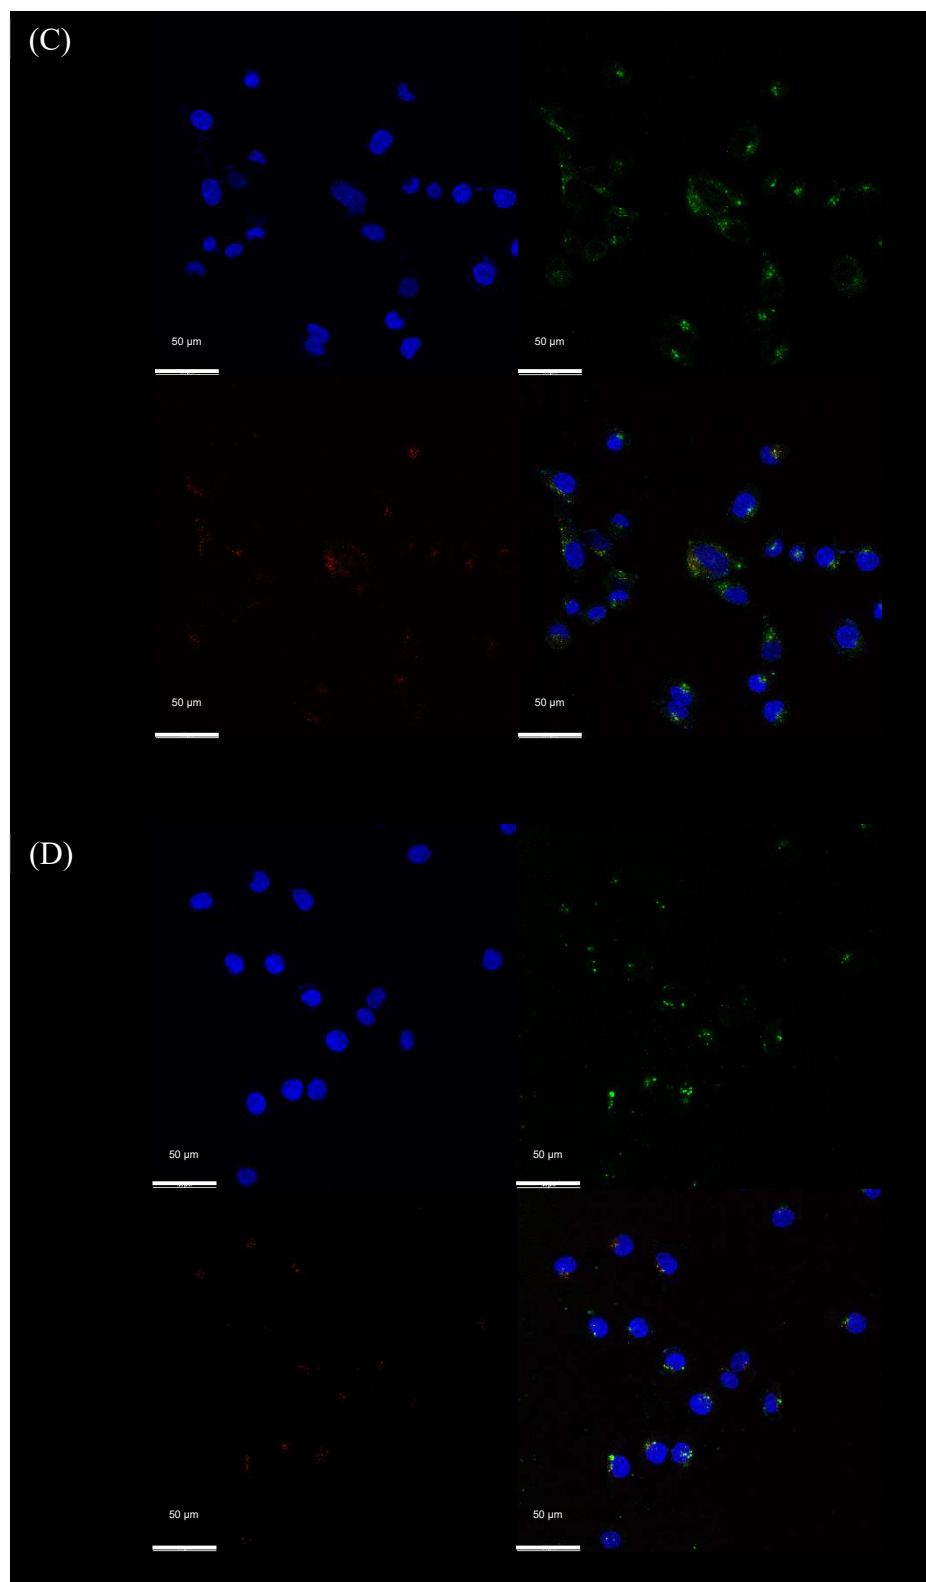

Figure S6. Magnified CLSM images of PEI25k/pDNA (A) and HECP2k 10X/pDNA (B) polyplexes in HeLa cells. After 4 h of treatment, cells were visualized after further incubation of 4 h (scale bar = 50  $\mu$ m).

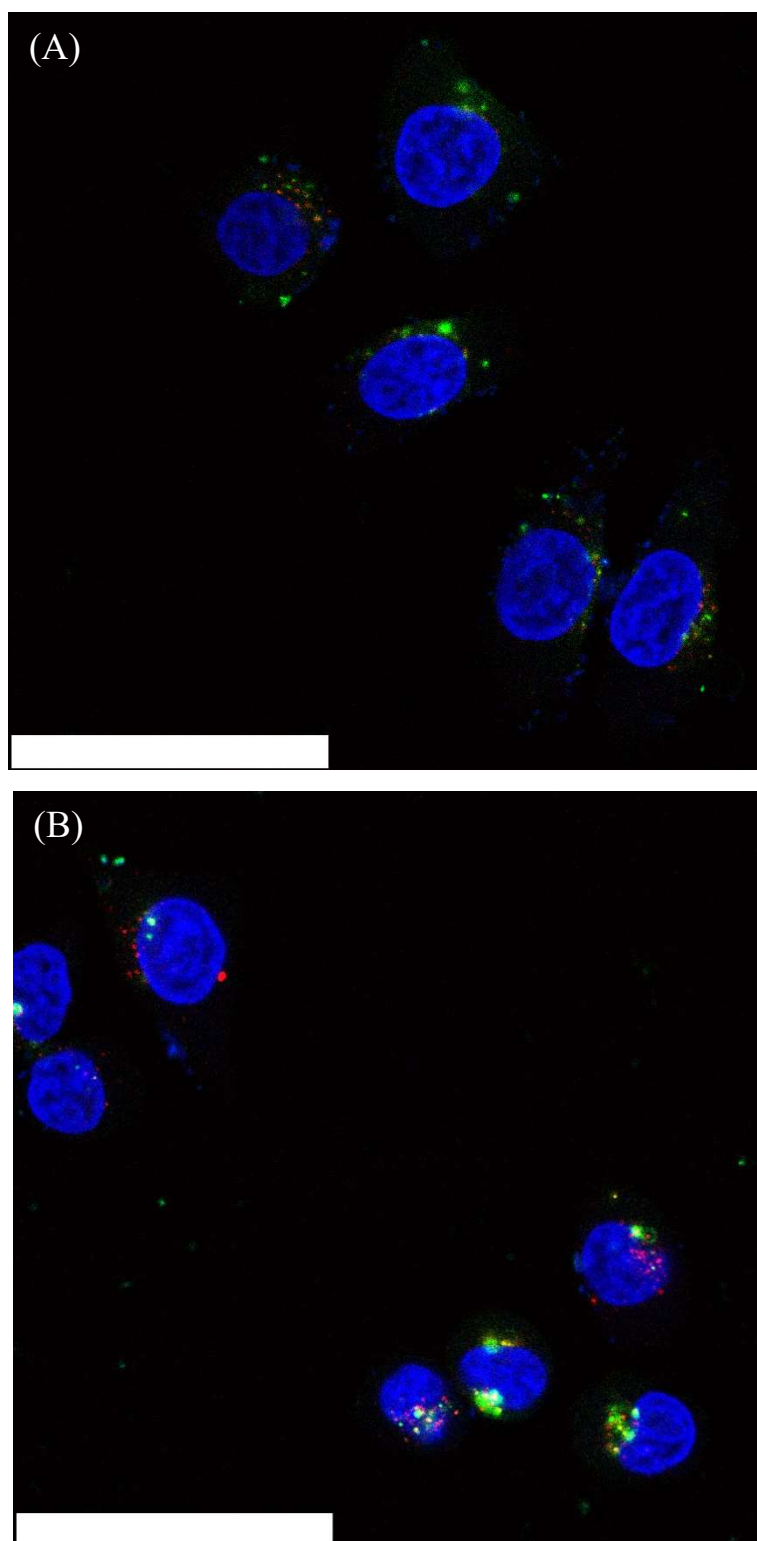

Figure S7. MTT assay results showing anti-cancer effects of free dox, free siRNA, PEI25k/siRNA, HECp2k 10X@Dox, HECp2k 10X/siRNA, and HECp2k 10X@Dox/siRNA complexes in (A) HeLa and (B) HepG2 cells.

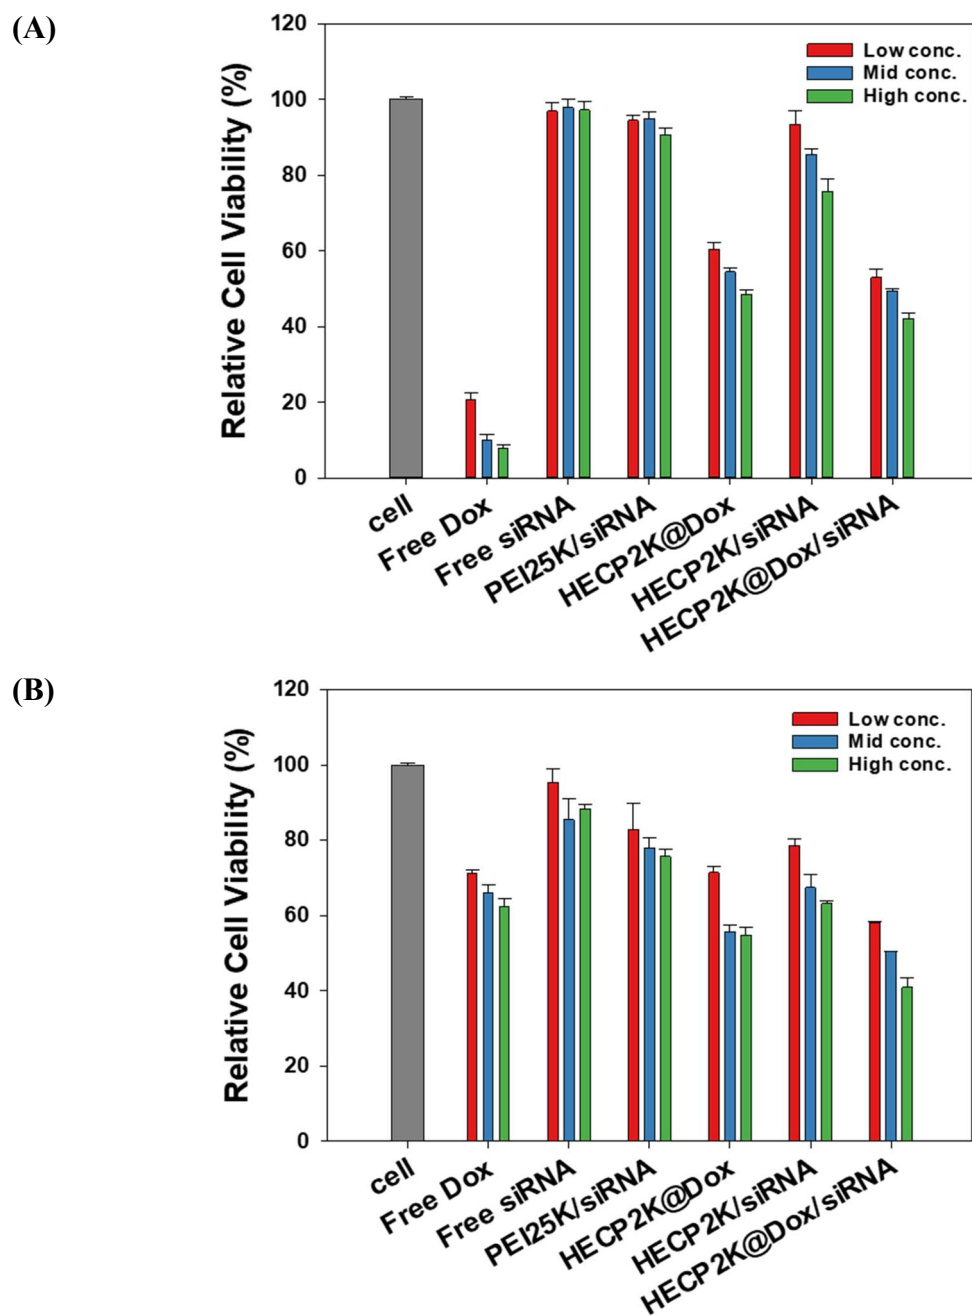



Figure S8. Dose-effect curves of Dox and siRNA in (A) HeLa and (B) HepG2 cells. Median effect plots for Dox in (C) HeLa and (D) HepG2 cells. Median effect plots for Bcl-2 siRNA in (E) HeLa and (F) HepG2 cells.

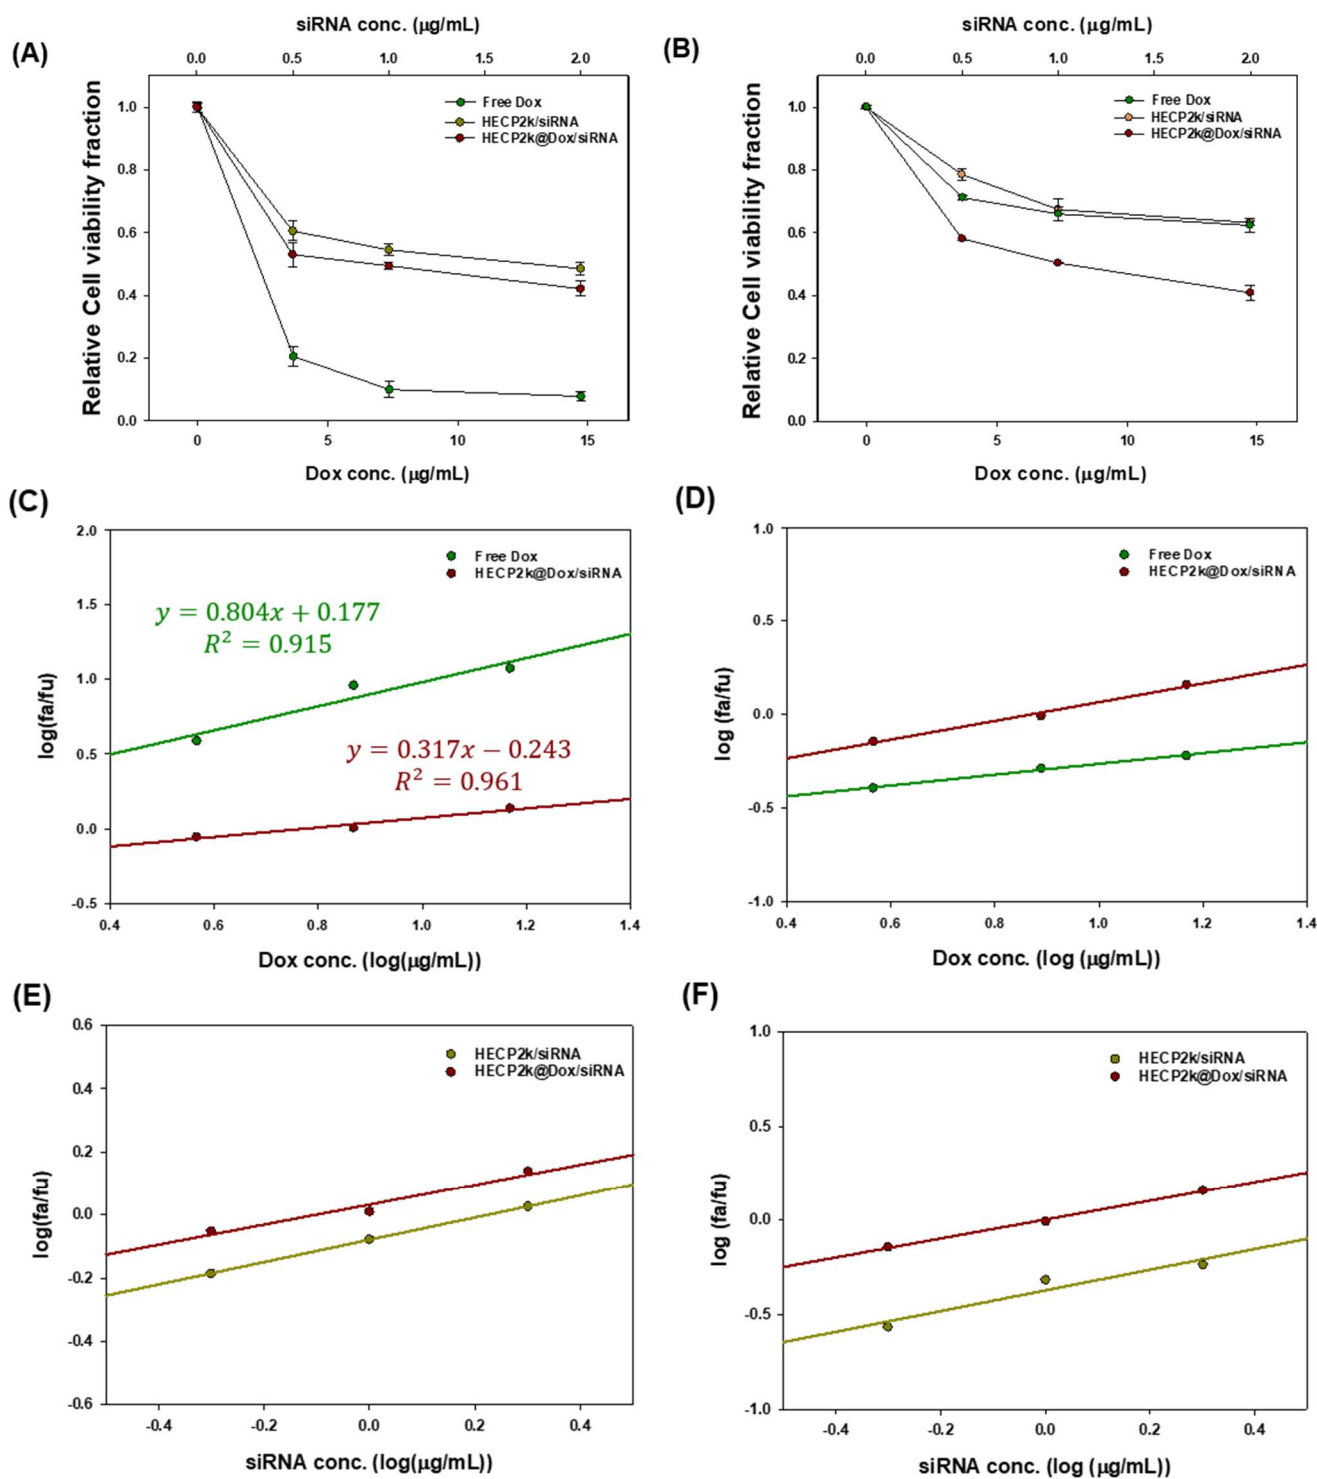

Figure S9. Combination index (CI) of HECP2k 10X@Dox/siRNA complexes based on the median effect plots for (A) HeLa and (B) HepG2 cells.

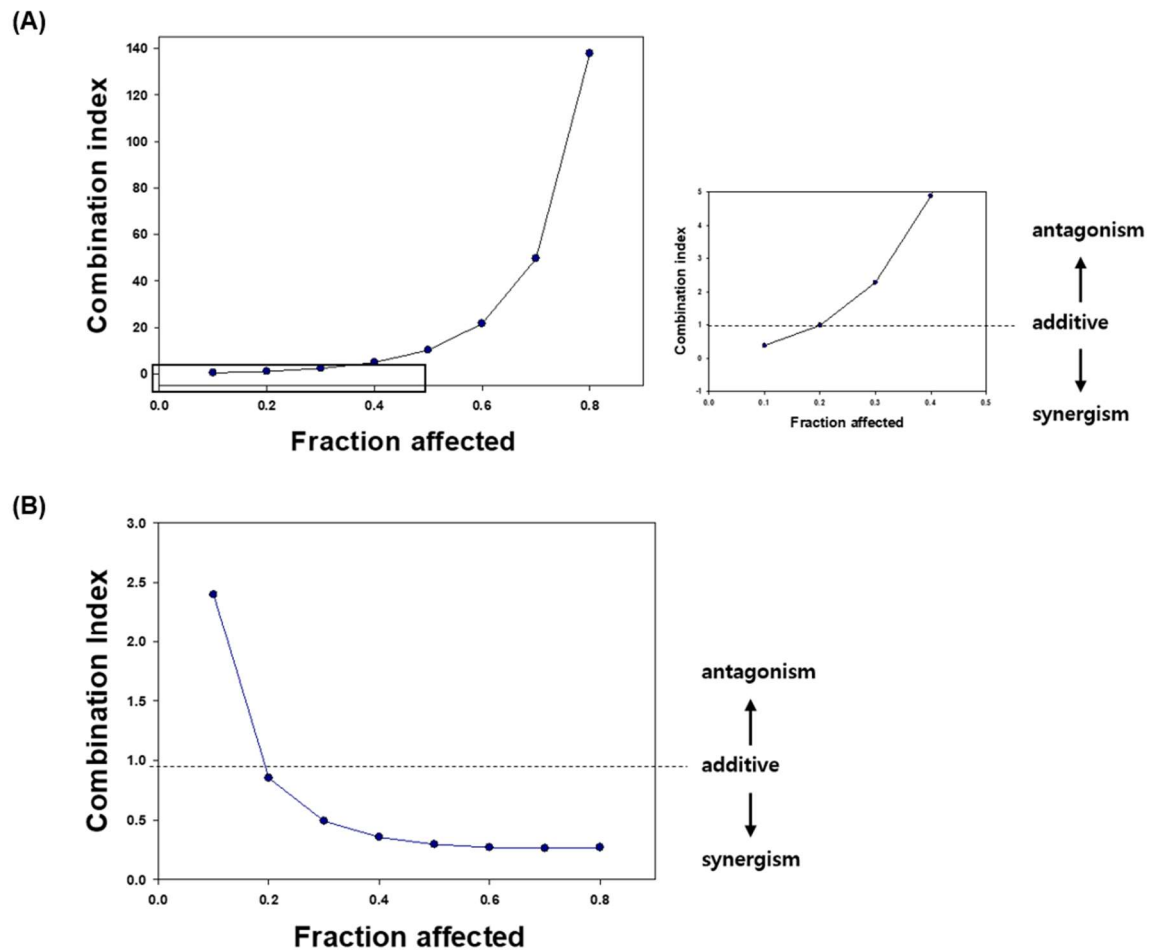

Table S1. Molecular mass analysis result of polymers by GPC.

| Sample     | Mn (GPC, kg/mol) | Mw (GPC, kg/mol) | PDI  | RT (min) |
|------------|------------------|------------------|------|----------|
| OxHEC      | 6.05             | 35.63            | 5.89 | 13.21    |
| PEI2k      | 1.95             | 4.61             | 2.36 | 14.25    |
| HECP2k 1X  | 5.88             | 13.92            | 2.37 | 13.70    |
| HECP2k 5X  | 3.97             | 9.38             | 2.36 | 13.95    |
| HECP2k 10X | 3.23             | 7.27             | 2.25 | 14.09    |

Table S2. Dox and Bcl-2 siRNA concentration for each condition.

| HECP2k@Dox | Dox (μg/mL) | siRNA (μg/mL) |
|------------|-------------|---------------|
| Low conc.  | 3.7         | 0.5           |
| Mid conc.  | 7.4         | 1             |
| High conc. | 14.8        | 2             |
